# Supplementary material
Source: MDPI journal article supplement (https://www.mdpi.com/2073-4395/13/2/585)
Supplement: s1 [file s1]

**Table S1.** Names and pedigree of the 20 bread wheat genotypes (6 cultivars and 14 doubled haploid lines (DHLs)) used in this study.

| Name                  | Pedigree                                                                      |
|-----------------------|-------------------------------------------------------------------------------|
| Gemmeiza-9            | Ald"s"/Huac//CMH74 .630/SxCGM 4583 -5GM- 1GM- OGM                             |
| Gemmeiza-12           | OTUS/3/SARA/THB//VEEMSS97Y00227S-5y-010M-010Y-010M-2Y-1M-0Y-OGM               |
| Sakha-93              | Sakha 92/TR810328 S8871-IS-2S-IS-0S                                           |
| Misr1                 | OASSIS / SKAUZ//4*BCN/3/2*PATOR CMSS00Y01881T-050M-030Y-030M-030WGY-33M-0Y-0S |
| Pavone-76             | Vcm//Cno/7C/3/Kal/Bb                                                          |
| KSU106                | Barouk/R1474-75-3-53-3-3                                                      |
| DHLs (23,25)          | Derived from the cross (Line-115 × Gemmeiza-7) (El-Hennawy et al. 2011)       |
| DHLs (5,7,8,11)       | Derived from the cross (Line-115 × Giza-164) (El-Hennawy et al. 2011)         |
| DHLs (12,14,15,26,29) | Derived from the cross (Gemmeiza-7× Giza-164) (El-Hennawy et al. 2011)        |
| DHLs (1,2, 6)         | Derived from the cross (Giza-164× Giza-168) (El-Hennawy et al. 2011)          |

**Table S2.** Details of genotype codes and names of 20 bread wheat genotypes (6 cultivars and 14 doubled haploid lines (DHLs)) used in this study

| Genotypes   | Genotype code | Genotypes | Genotype code |
|-------------|---------------|-----------|---------------|
| DHL12       | G1            | DHL14     | G11           |
| DHL02       | G2            | DHL29     | G12           |
| DHL25       | G3            | DHL15     | G13           |
| DHL07       | G4            | DHL06     | G14           |
| DHL26       | G5            | Misr1     | G15           |
| Gemmeiza-9  | G6            | DHL05     | G16           |
| DHL11       | G7            | DHL23     | G17           |
| KSU106      | G8            | Sakha-93  | G18           |
| Gemmeiza-12 | G9            | Pavone-76 | G19           |
| DHL01       | G10           | DHL08     | G20           |

Table S3. Monthly agro-climatological data at the experimental location during the growing seasons.

| Parameters<br>Months | Precipitation (mm) |      |      | Temperature (°C) |       |       |         |       |       |         |       |       | Relative Humidity (%) |       |       |
|----------------------|--------------------|------|------|------------------|-------|-------|---------|-------|-------|---------|-------|-------|-----------------------|-------|-------|
|                      |                    |      |      | Maximum          |       |       | Minimum |       |       | Average |       |       |                       |       |       |
|                      | S1                 | S2   | S3   | S1               | S2    | S3    | S1      | S2    | S3    | S1      | S2    | S3    | S1                    | S2    | S3    |
| November             | 0.31               | 0.27 | 0.17 | 35.37            | 34.82 | 28.07 | 5.05    | 5.84  | 16.37 | 20.21   | 20.33 | 22.03 | 41.69                 | 41.21 | 41.34 |
| December             | 0.02               | 0.10 | 0.05 | 27.40            | 27.46 | 21.84 | 4.01    | 4.95  | 10.58 | 15.71   | 16.21 | 16.10 | 45.31                 | 44.36 | 55.45 |
| January              | 0.10               | 0.05 | 0.10 | 29.34            | 28.65 | 19.87 | 1.23    | 2.01  | 8.32  | 15.29   | 15.33 | 14.06 | 40.19                 | 40.68 | 47.37 |
| February             | 0.00               | 0.00 | 0.00 | 33.79            | 32.43 | 24.66 | 1.21    | 2.08  | 11.62 | 17.50   | 17.26 | 18.19 | 28.44                 | 29.26 | 32.89 |
| March                | 0.00               | 0.00 | 0.00 | 35.80            | 36.19 | 28.65 | 6.98    | 7.01  | 15.77 | 21.39   | 21.60 | 22.41 | 25.69                 | 26.02 | 28.79 |
| April                | 0.98               | 1.02 | 0.98 | 39.91            | 38.63 | 33.70 | 14.13   | 15.11 | 21.53 | 27.02   | 26.87 | 27.73 | 31.50                 | 30.24 | 31.38 |
| May                  | 0.01               | 0.00 | 0.01 | 42.91            | 41.77 | 38.97 | 19.21   | 19.94 | 24.87 | 31.06   | 30.86 | 32.37 | 17.69                 | 17.05 | 19.69 |

S1, Season 2018/2019; S2, Season 2019/2020, S3, Season 2020/2021.

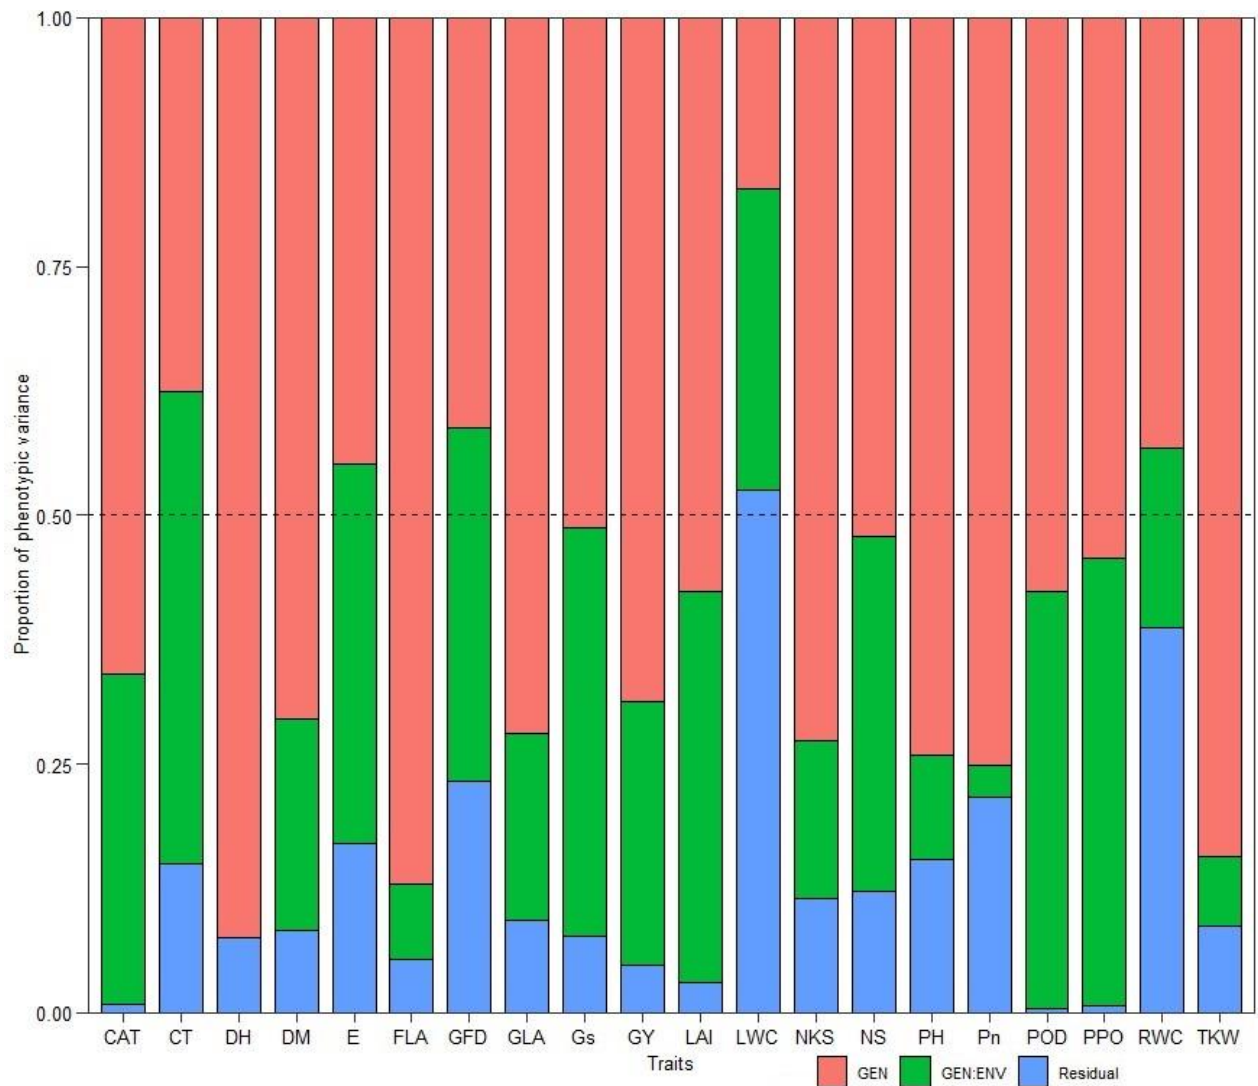

Figure S1. Estimated variance components for 20 studied traits for 20 wheat genotypes in nine environments

Table S4. Deviance analysis, estimated variance components and genetic parameters for grain yield of 20 wheat genotypes evaluated in nine environments.

| Traits                        |            | DH                      | DM                     | GFD                    | NS                     | PH                     |
|-------------------------------|------------|-------------------------|------------------------|------------------------|------------------------|------------------------|
| G                             | $\chi^2$   | 508                     | 171                    | 71.7                   | 94.8                   | 228                    |
|                               | $p$ -value | $1.84 \times 10^{-112}$ | $3.57 \times 10^{-39}$ | $2.55 \times 10^{-17}$ | $2.11 \times 10^{-22}$ | $1.88 \times 10^{-51}$ |
| GEI                           | $\chi^2$   | 0.0354                  | 271                    | 173                    | 301                    | 71.6                   |
|                               | $p$ -value | 0.851                   | $7.87 \times 10^{-61}$ | $1.93 \times 10^{-39}$ | $2.33 \times 10^{-67}$ | $2.59 \times 10^{-17}$ |
| REML                          |            |                         |                        |                        |                        |                        |
| Estimated variance components |            |                         |                        |                        |                        |                        |
| $\sigma_g^2$                  |            | 11.40 (92.40)           | 9.67 (70.50)           | 2.78 (41.30)           | 2000.00 (52.10)        | 37.30 (74.20)          |
| $\sigma_{ge}^2$               |            | 0.01 (0.07)             | 2.91 (21.20)           | 2.39 (35.50)           | 1370.00 (35.70)        | 5.25 (10.40)           |
| $\sigma_e^2$                  |            | 0.92 (7.49)             | 1.14 (8.29)            | 1.57 (23.30)           | 468.00 (12.20)         | 7.72 (15.40)           |
| $\sigma_p^2$                  |            | 12.33                   | 13.7                   | 6.74                   | 3850                   | 50.3                   |
| $H^2$                         |            | 0.924                   | 0.705                  | 0.413                  | 0.521                  | 0.742                  |
| $R^2_{gei}$                   |            | 0.0007                  | 0.212                  | 0.355                  | 0.357                  | 0.104                  |
| $h^2_{mg}$                    |            | 0.997                   | 0.964                  | 0.896                  | 0.922                  | 0.977                  |
| AS                            |            | 0.998                   | 0.982                  | 0.946                  | 0.96                   | 0.989                  |
| $r_{ge}$                      |            | 0.009                   | 0.719                  | 0.604                  | 0.746                  | 0.405                  |
| $CV_g\%$                      |            | 4.58                    | 2.68                   | 3.97                   | 10.2                   | 7.85                   |
| $CV_r\%$                      |            | 1.3                     | 0.92                   | 2.98                   | 4.92                   | 3.57                   |
| CV ratio                      |            | 3.51                    | 2.92                   | 1.33                   | 2.07                   | 2.2                    |
| SD                            |            | 4.09                    | 6.75                   | 4.22                   | 89.14                  | 7.93                   |
| SE                            |            | 0.18                    | 0.29                   | 0.18                   | 3.84                   | 0.34                   |

Table S4. Cont.

| Traits                        |            | FLA                    | GLA                    | LAI                     | LWC                    | RWC                    |
|-------------------------------|------------|------------------------|------------------------|-------------------------|------------------------|------------------------|
| G                             | $\chi^2$   | 316                    | 184                    | 102                     | 25.3                   | 100                    |
|                               | $p$ -value | $1.33 \times 10^{-70}$ | $6.28 \times 10^{-42}$ | $5.13 \times 10^{-24}$  | $5.02 \times 10^{-07}$ | $1.42 \times 10^{-23}$ |
| GEI                           | $\chi^2$   | 157                    | 221                    | 705                     | 58.1                   | 43.6                   |
|                               | $p$ -value | $5.70 \times 10^{-36}$ | $4.47 \times 10^{-50}$ | $2.92 \times 10^{-155}$ | $2.48 \times 10^{-01}$ | $4.07 \times 10^{-11}$ |
| REML                          |            |                        |                        |                         |                        |                        |
| Estimated variance components |            |                        |                        |                         |                        |                        |
| $\sigma_g^2$                  |            | 15.00 (87.10)          | 190.00 (71.90)         | 0.42 (57.70)            | 1.83 (17.30)           | 11.00 (43.30)          |
| $\sigma_{ge}^2$               |            | 1.29 (7.48)            | 49.50 (18.70)          | 0.28 (39.20)            | 3.21 (30.20)           | 4.57 (18.00)           |
| $\sigma_e^2$                  |            | 0.94 (5.43)            | 24.70 (9.34)           | 0.02 (3.03)             | 5.57 (52.50)           | 9.84 (38.70)           |
| $\sigma_p^2$                  |            | 17.3                   | 264                    | 0.721                   | 10.6                   | 25.4                   |
| $H^2$                         |            | 0.871                  | 0.719                  | 0.577                   | 0.173                  | 0.433                  |
| $R^2_{gei}$                   |            | 0.0748                 | 0.187                  | 0.392                   | 0.302                  | 0.18                   |
| $h^2_{mg}$                    |            | 0.988                  | 0.967                  | 0.928                   | 0.765                  | 0.926                  |
| AS                            |            | 0.994                  | 0.984                  | 0.963                   | 0.875                  | 0.963                  |
| $r_{ge}$                      |            | 0.58                   | 0.667                  | 0.928                   | 0.366                  | 0.317                  |
| $CV_g\%$                      |            | 18.2                   | 17.8                   | 19.8                    | 1.88                   | 4.16                   |
| $CV_r\%$                      |            | 4.54                   | 6.42                   | 4.53                    | 3.27                   | 3.93                   |
| CV ratio                      |            | 4.01                   | 2.77                   | 4.36                    | 0.573                  | 1.06                   |
| SD                            |            | 4.34                   | 18.61                  | 3.32                    | 3.99                   | 6.32                   |
| SE                            |            | 0.19                   | 0.8                    | 0.14287                 | 0.17                   | 0.27                   |

| Table S4. Cont. |            |                               |                        |                        |                        |                        |
|-----------------|------------|-------------------------------|------------------------|------------------------|------------------------|------------------------|
| Traits          |            | NKS                           | TKW                    | CT                     | Pn                     | Gs                     |
| G               | $\chi^2$   | 197                           | 303                    | 54.4                   | 281                    | 86.7                   |
|                 | $p$ -value | $8.87 \times 10^{-45}$        | $7.35 \times 10^{-68}$ | $1.62 \times 10^{-13}$ | $4.13 \times 10^{-63}$ | $1.29 \times 10^{-20}$ |
| GEI             | $\chi^2$   | 158                           | 88                     | 317                    | 7.2                    | 446                    |
|                 | $p$ -value | $2.57 \times 10^{-36}$        | $6.43 \times 10^{-21}$ | $5.89 \times 10^{-71}$ | $7.30 \times 10^{-3}$  | $5.14 \times 10^{-99}$ |
| REML            |            | Estimated variance components |                        |                        |                        |                        |
| $\sigma_g^2$    |            | 20.00 (72.70%)                | 23.40 (84.40%)         | 0.16 (37.60%)          | 2.19 (75.20%)          | 0.000 (51.30%)         |
| $\sigma_{ge}^2$ |            | 4.38 (15.90%)                 | 1.94 (6.99%)           | 0.21 (47.40%)          | 0.09 (3.15%)           | 0.000 (40.90%)         |
| $\sigma_e^2$    |            | 3.15 (11.40%)                 | 2.40 (8.66%)           | 0.07 (15.00%)          | 0.63 (21.70%)          | 0.000 (7.73%)          |
| $\sigma_p^2$    |            | 27.6                          | 27.7                   | 0.435                  | 2.91                   | 0.000863               |
| $H^2$           |            | 0.727                         | 0.844                  | 0.376                  | 0.752                  | 0.513                  |
| $R^2_{gei}$     |            | 0.159                         | 0.0699                 | 0.474                  | 0.0315                 | 0.409                  |
| $h^2_{mg}$      |            | 0.971                         | 0.987                  | 0.866                  | 0.985                  | 0.914                  |
| AS              |            | 0.985                         | 0.994                  | 0.931                  | 0.992                  | 0.956                  |
| $r_{ge}$        |            | 0.582                         | 0.447                  | 0.76                   | 0.127                  | 0.841                  |
| $CV_g\%$        |            | 12.9                          | 11.3                   | 2.17                   | 14.2                   | 14.6                   |
| $CV_r\%$        |            | 5.1                           | 3.62                   | 1.37                   | 7.63                   | 5.66                   |
| CV ratio        |            | 2.52                          | 3.12                   | 1.58                   | 1.86                   | 2.58                   |
| SD              |            | 5.62                          | 6.7                    | 1.3                    | 1.79                   | 0.24                   |
| SE              |            | 0.24                          | 0.29                   | 0.06                   | 0.08                   | 0.01                   |

| Table S4. Cont. |            |                               |                         |                         |                         |                         |
|-----------------|------------|-------------------------------|-------------------------|-------------------------|-------------------------|-------------------------|
| Traits          |            | E                             | POD                     | PPO                     | CAT                     | GY                      |
| G               | $\chi^2$   | 76.4                          | 98.6                    | 88.1                    | 131                     | 152                     |
|                 | $p$ -value | $2.36 \times 10^{-18}$        | $3.17 \times 10^{-23}$  | $6.19 \times 10^{-21}$  | $2.85 \times 10^{-30}$  | $6.52 \times 10^{-35}$  |
| GEI             | $\chi^2$   | 243                           | 1390                    | 1210                    | 1050                    | 457                     |
|                 | $p$ -value | $7.56 \times 10^{-55}$        | $8.46 \times 10^{-304}$ | $5.43 \times 10^{-266}$ | $9.30 \times 10^{-230}$ | $2.26 \times 10^{-101}$ |
| REML            |            | Estimated variance components |                         |                         |                         |                         |
| $\sigma_g^2$    |            | 0.0652 (44.80)                | 0.000 (57.70)           | 0.000 (54.30)           | 0.000 (66.00)           | 0.62 (68.70)            |
| $\sigma_{ge}^2$ |            | 0.0555 (38.10)                | 0.000 (41.90)           | 0.000 (44.90)           | 0.000 (33.10)           | 0.24 (26.50)            |
| $\sigma_e^2$    |            | 0.0247 (17.00)                | 0.000 (0.40)            | 0.00 (0.72)             | 0.000 (0.88)            | 0.04 (4.81)             |
| $\sigma_p^2$    |            | 0.145                         | 0.000113                | 0.000065                | 0.000051                | 0.905                   |
| $H^2$           |            | 0.448                         | 0.577                   | 0.543                   | 0.66                    | 0.687                   |
| $R^2_{gei}$     |            | 0.381                         | 0.419                   | 0.449                   | 0.331                   | 0.265                   |
| $h^2_{mg}$      |            | 0.902                         | 0.925                   | 0.915                   | 0.947                   | 0.957                   |
| AS              |            | 0.95                          | 0.962                   | 0.957                   | 0.973                   | 0.978                   |
| $r_{ge}$        |            | 0.692                         | 0.991                   | 0.984                   | 0.974                   | 0.846                   |
| $CV_g\%$        |            | 9.81                          | 44.5                    | 33                      | 38.9                    | 17.4                    |
| $CV_r\%$        |            | 6.04                          | 3.71                    | 3.8                     | 4.48                    | 4.61                    |
| CV ratio        |            | 1.62                          | 12                      | 8.68                    | 8.67                    | 3.78                    |
| SD              |            | 0.5                           | 0.41                    | 0.521                   | 0.61                    | 1.09                    |
| SE              |            | 0.02                          | 0.017643591             | 0.02242                 | 0.02625                 | 0.05                    |

Table S5. Phenotypic (upper diagonal) and genotypic (below diagonal) correlations among 20 studied traits obtained from nine environments (n = 180).

|     | DH     | DM     | GFD    | NS     | PH     | FLA    | GLA    | LAI    | LWC    | RWC    | NKS    | TKW    | CT     | Pn     | Gs     | E      | POD    | PPO    | CAT    | GY     |
|-----|--------|--------|--------|--------|--------|--------|--------|--------|--------|--------|--------|--------|--------|--------|--------|--------|--------|--------|--------|--------|
| DH  | 1.000  | 0.842  | -0.361 | 0.227  | 0.404  | -0.417 | 0.074  | 0.377  | -0.465 | -0.037 | -0.143 | -0.687 | -0.145 | 0.469  | -0.101 | 0.018  | -0.160 | -0.148 | -0.245 | 0.272  |
| DM  | 0.835  | 1.000  | 0.229  | 0.322  | 0.350  | -0.349 | 0.128  | 0.498  | -0.435 | 0.124  | -0.023 | -0.757 | -0.226 | 0.597  | 0.121  | 0.259  | 0.078  | -0.154 | -0.085 | 0.510  |
| GFD | -0.339 | 0.226  | 1.000  | 0.135  | -0.129 | 0.181  | 0.107  | 0.179  | 0.175  | 0.367  | 0.185  | -0.090 | -0.149 | 0.256  | 0.461  | 0.464  | 0.371  | 0.023  | 0.306  | 0.330  |
| NS  | 0.221  | 0.314  | 0.121  | 1.000  | 0.364  | -0.211 | -0.033 | 0.582  | -0.212 | -0.026 | -0.388 | -0.146 | -0.362 | -0.317 | -0.348 | -0.122 | 0.252  | -0.020 | 0.306  | 0.406  |
| PH  | 0.396  | 0.343  | -0.126 | 0.362  | 1.000  | 0.241  | 0.520  | 0.634  | 0.010  | 0.011  | 0.016  | 0.094  | -0.512 | 0.124  | 0.023  | -0.008 | -0.119 | -0.339 | -0.500 | 0.144  |
| FLA | -0.416 | -0.346 | 0.174  | -0.207 | 0.240  | 1.000  | 0.850  | 0.405  | 0.534  | 0.409  | 0.257  | 0.538  | -0.451 | 0.088  | 0.438  | 0.286  | -0.149 | -0.157 | -0.365 | -0.187 |
| GLA | 0.073  | 0.127  | 0.105  | -0.032 | 0.516  | 0.845  | 1.000  | 0.742  | 0.245  | 0.354  | 0.213  | 0.200  | -0.611 | 0.316  | 0.394  | 0.340  | -0.095 | -0.195 | -0.472 | 0.057  |
| LAI | 0.374  | 0.495  | 0.169  | 0.579  | 0.628  | 0.405  | 0.738  | 1.000  | -0.177 | 0.157  | 0.025  | -0.120 | -0.719 | 0.180  | 0.050  | 0.175  | 0.070  | -0.219 | -0.198 | 0.435  |
| LWC | -0.420 | -0.382 | 0.145  | -0.192 | 0.013  | 0.477  | 0.222  | -0.151 | 1.000  | 0.494  | 0.039  | 0.402  | 0.100  | -0.120 | 0.238  | 0.098  | -0.249 | -0.056 | -0.091 | -0.276 |
| RWC | -0.037 | 0.124  | 0.324  | -0.029 | 0.006  | 0.398  | 0.344  | 0.156  | 0.447  | 1.000  | -0.200 | 0.047  | -0.405 | 0.386  | 0.559  | 0.631  | -0.183 | -0.289 | -0.181 | 0.055  |
| NKS | -0.141 | -0.025 | 0.174  | -0.381 | 0.014  | 0.252  | 0.206  | 0.023  | 0.040  | -0.195 | 1.000  | -0.194 | 0.110  | 0.082  | -0.019 | -0.238 | -0.221 | -0.273 | -0.221 | 0.165  |
| TKW | -0.685 | -0.752 | -0.087 | -0.143 | 0.095  | 0.535  | 0.201  | -0.119 | 0.369  | 0.042  | -0.190 | 1.000  | -0.045 | -0.368 | 0.078  | -0.029 | 0.017  | 0.081  | -0.119 | -0.427 |
| CT  | -0.144 | -0.222 | -0.143 | -0.350 | -0.496 | -0.445 | -0.597 | -0.704 | 0.100  | -0.387 | 0.110  | -0.042 | 1.000  | -0.183 | -0.290 | -0.393 | 0.042  | 0.292  | 0.256  | -0.230 |
| Pn  | 0.451  | 0.580  | 0.239  | -0.314 | 0.125  | 0.088  | 0.316  | 0.174  | -0.067 | 0.376  | 0.085  | -0.352 | -0.179 | 1.000  | 0.530  | 0.502  | -0.035 | -0.070 | -0.239 | 0.199  |
| Gs  | -0.097 | 0.119  | 0.440  | -0.341 | 0.019  | 0.433  | 0.388  | 0.050  | 0.211  | 0.542  | -0.018 | 0.074  | -0.285 | 0.509  | 1.000  | 0.902  | -0.110 | 0.030  | -0.330 | -0.258 |
| E   | 0.019  | 0.252  | 0.444  | -0.114 | -0.009 | 0.280  | 0.337  | 0.172  | 0.082  | 0.593  | -0.230 | -0.024 | -0.384 | 0.487  | 0.883  | 1.000  | 0.067  | 0.125  | -0.235 | -0.131 |
| POD | -0.158 | 0.078  | 0.360  | 0.250  | -0.118 | -0.148 | -0.094 | 0.070  | -0.222 | -0.179 | -0.219 | 0.016  | 0.042  | -0.034 | -0.109 | 0.065  | 1.000  | 0.641  | 0.631  | 0.158  |
| PPO | -0.147 | -0.154 | 0.018  | -0.019 | -0.335 | -0.156 | -0.193 | -0.218 | -0.049 | -0.283 | -0.269 | 0.081  | 0.288  | -0.066 | 0.030  | 0.124  | 0.641  | 1.000  | 0.617  | -0.414 |
| CAT | -0.244 | -0.085 | 0.293  | 0.304  | -0.497 | -0.364 | -0.469 | -0.197 | -0.088 | -0.178 | -0.219 | -0.118 | 0.251  | -0.234 | -0.328 | -0.230 | 0.630  | 0.617  | 1.000  | -0.021 |
| GY  | 0.271  | 0.504  | 0.318  | 0.401  | 0.144  | -0.184 | 0.058  | 0.432  | -0.251 | 0.052  | 0.163  | -0.425 | -0.224 | 0.191  | -0.256 | -0.129 | 0.158  | -0.413 | -0.020 | 1.000  |
